# Supplementary material for: Natural hazard events affecting transportation networks in Switzerland from 2012 to 2016
Source: Copernicus journal article supplement (doi:10.5194/nhess-2018-27), 2018-02-07
Supplement: Supplementary file 1 [file nhess-2018-27-supplement.pdf]

# 1 Supplementary material

## 2 1.1 Tables

3 Numbers between brackets in the following tables refer to the number of considered elements  
4 according to the line or column attribute.

5 *Table 1: Distribution of event location according the three Swiss geomorphologic-climatic regions and*  
6 *according event processes.*

| Geomorphologic-climatic region | Flood (420) | Debris flow (69) | Landslide (192) | Rockfall (96) | Avalanche (16) | Other (53) | Average |
|--------------------------------|-------------|------------------|-----------------|---------------|----------------|------------|---------|
| Jura (98)                      | 19%         | 0%               | 3%              | 6%            | 0%             | 15%        | 12%     |
| Swiss Plateau (371)            | 57%         | 4%               | 42%             | 6%            | 0%             | 79%        | 44%     |
| Alps (377)                     | 24%         | 96%              | 55%             | 88%           | 100%           | 6%         | 44%     |
| Total (846)                    | 100%        | 100%             | 100%            | 100%          | 100%           | 100%       | 100%    |

7  
8 *Table 2: Distribution of event location according event processes.*

| Event location | Flood (420) | Debris flow (69) | Landslide (192) | Rockfall (96) | Avalanche (16) | Other (53) | Average |
|----------------|-------------|------------------|-----------------|---------------|----------------|------------|---------|
| Town (151)     | 15%         | 0%               | 9%              | 1%            | 0%             | 6%         | 18%     |
| Village (261)  | 46%         | 14%              | 12%             | 6%            | 13%            | 4%         | 31%     |
| Forest (185)   | 4%          | 46%              | 38%             | 58%           | 13%            | 13%        | 22%     |
| Unforest (249) | 0%          | 6%               | 5%              | 12%           | 69%            | 0%         | 29%     |
| Total (846)    | 100%        | 100%             | 100%            | 100%          | 100%           | 100%       | 100%    |

9  
10 *Table 3: Distribution of slope angle according event processes.*

| Slope angle     | Flood (420) | Debris flow (69) | Landslide (192) | Rockfall (96) | Avalanche (16) | Other (53) | Average |
|-----------------|-------------|------------------|-----------------|---------------|----------------|------------|---------|
| 0°-10° (339)    | 62%         | 17%              | 12%             | 5%            | 6%             | 68%        | 40%     |
| 10°-20° (257)   | 31%         | 43%              | 29%             | 19%           | 38%            | 28%        | 30%     |
| 20°-30° (131)   | 4%          | 23%              | 33%             | 31%           | 38%            | 2%         | 15%     |
| 30°-40° (85)    | 2%          | 12%              | 21%             | 26%           | 19%            | 0%         | 10%     |
| 40°-50° (26)    | 0%          | 4%               | 4%              | 14%           | 0%             | 2%         | 3%      |
| 50°-60° (6)     | 0%          | 0%               | 1%              | 4%            | 0%             | 0%         | 1%      |
| 60 and more (2) | 0%          | 0%               | 1%              | 1%            | 0%             | 0%         | 0%      |
| Total (846)     | 100%        | 100%             | 100%            | 100%          | 100%           | 100%       | 100%    |

11  
12 *Table 4: Distribution of events importance according event processes.*

| Location of process origin | Flood (420) | Debris flow (69) | Landslide (192) | Rockfall (96) | Avalanche (16) | Other (53) | Average |
|----------------------------|-------------|------------------|-----------------|---------------|----------------|------------|---------|
| Small <sup>1</sup> (804)   | 100%        | 78%              | 96%             | 24%           | 81%            | 100%       | 95%     |
| Middle <sup>2</sup> (33)   | 0%          | 19%              | 3%              | 43%           | 19%            | 0%         | 4%      |
| Large <sup>3</sup> (9)     | 0%          | 3%               | 1%              | 33%           | 0%             | 0%         | 1%      |
| Total (846)                | 100%        | 100%             | 100%            | 100%          | 100%           | 100%       | 100%    |

13 <sup>1</sup> Small event: volume <10 m<sup>3</sup>.

14 <sup>2</sup> Middle event: volume between 10-2000 m<sup>3</sup>.

15 <sup>3</sup> Large event: volume > 2000 m<sup>3</sup>.

16  
17 *Table 5: Distribution of distances of the process origin types processes according event processes.*

| Distance of the process origin | Debris flow (69) | Landslide (192) | Rockfall (96) | Avalanche (16) | Other (53) | Average |
|--------------------------------|------------------|-----------------|---------------|----------------|------------|---------|
| Near <sup>1</sup> (185)        | 0%               | 52%             | 33%           | 6%             | 100%       | 35%     |
| Far <sup>2</sup> (146)         | 100%             | 11%             | 43%           | 94%            | 0%         | 39%     |
| Unknown (95)                   | 0%               | 37%             | 24%           | 0%             | 0%         | 26%     |
| Total (426)                    | 100%             | 100%            | 100%          | 100%           | 100%       | 100%    |

18 <sup>1</sup> Near: 0-50 m from the track.

19 <sup>2</sup> Far: > 50 m from the track.

20  
21

22 *Table 6: Distribution of location of process origin according event processes.*

| Location of process origin | Debris flow (69) | Landslide (192) | Rockfall (96) | Avalanche (16) | Other (53) | Average |
|----------------------------|------------------|-----------------|---------------|----------------|------------|---------|
| Above track (339)          | 100%             | 60%             | 89%           | 100%           | 100%       | 80%     |
| Below track (29)           | 0%               | 14%             | 2%            | 0%             | 0%         | 7%      |
| Unknown (58)               | 0%               | 26%             | 9%            | 0%             | 0%         | 14%     |
| Total (426)                | 100%             | 100%            | 100%          | 100%           | 100%       | 100%    |

23  
24 *Table 7: Rainfall [mm] during the natural hazard events on the Swiss transportation network during from 2012*  
25 *to 2016.*

| Rainfall* [mm]                               | Flood | Debris flow | Landslide | Rockfall | Avalanche | Other | Average |
|----------------------------------------------|-------|-------------|-----------|----------|-----------|-------|---------|
| Event day                                    | 22    | 14          | 17        | 5        | 4         | 4     | 17      |
| Cum. last 5 days <sup>1</sup>                | 49    | 32          | 57        | 27       | 32        | 15    | 45      |
| Cum. last 10 days <sup>1</sup>               | 76    | 55          | 88        | 52       | 46        | 36    | 71      |
| Daily rain avg last 5 days <sup>2</sup>      | 10    | 6           | 11        | 6        | 6         | 3     | 9       |
| Daily rain avg last 10 days <sup>2</sup>     | 7     | 5           | 9         | 5        | 5         | 4     | 7       |
| Max daily rain last 5 days <sup>3</sup>      | 30    | 21          | 32        | 15       | 18        | 11    | 27      |
| Max daily rain last 10 days <sup>3</sup>     | 33    | 26          | 36        | 20       | 21        | 15    | 30      |
| Abs max daily rain <sup>4</sup>              | 100   | 65          | 154       | 42       | 13        | 39    | -       |
| Abs max daily rain last 5 days <sup>4</sup>  | 154   | 75          | 154       | 77       | 140       | 39    | -       |
| Abs max daily rain last 10 days <sup>4</sup> | 154   | 75          | 154       | 109      | 140       | 39    | -       |

26 \* Average by event processes except for absolute values (last three lines of the table).

27 <sup>1</sup> Cumulative rainfall of the 5 and respectively 10 days ago from the event day.

28 <sup>2</sup> Daily rainfall average of the 5 and respectively 10 days ago from the event day.

29 <sup>3</sup> Maximum daily rainfall of the 5 and respectively 10 days from the event day.

30 <sup>4</sup> Absolute maximum rainfall recorded (i.e. for one event) of the event day, the 5 and respectively 10 days from the event day.

31  
32 *Table 8: Monthly distribution of events according event processes.*

| Year           | Flood (420) | Debris flow (69) | Landslide (192) | Rockfall (96) | Avalanche (16) | Other (53) | Average |
|----------------|-------------|------------------|-----------------|---------------|----------------|------------|---------|
| January (27)   | 0%          | 4%               | 4%              | 15%           | 6%             | 0%         | 3%      |
| February (65)  | 0%          | 1%               | 6%              | 6%            | 19%            | 81%        | 8%      |
| March (26)     | 1%          | 0%               | 2%              | 13%           | 50%            | 2%         | 3%      |
| April (28)     | 2%          | 0%               | 6%              | 7%            | 0%             | 2%         | 3%      |
| May (107)      | 13%         | 10%              | 16%             | 15%           | 0%             | 2%         | 13%     |
| June (253)     | 41%         | 16%              | 29%             | 7%            | 0%             | 8%         | 30%     |
| July (210)     | 31%         | 51%              | 19%             | 8%            | 0%             | 2%         | 25%     |
| August (35)    | 4%          | 12%              | 4%              | 1%            | 0%             | 2%         | 4%      |
| September (14) | 1%          | 6%               | 2%              | 2%            | 0%             | 0%         | 2%      |
| October (14)   | 1%          | 0%               | 1%              | 10%           | 0%             | 0%         | 2%      |
| November (58)  | 6%          | 0%               | 9%              | 11%           | 6%             | 2%         | 7%      |
| December (9)   | 0%          | 0%               | 1%              | 4%            | 19%            | 0%         | 1%      |
| Total (846)    | 100%        | 100%             | 100%            | 100%          | 100%           | 100%       | 100%    |

33  
34 *Table 9: Distribution of transport mode according event processes.*

| Transport mode | Flood (420) | Debris flow (69) | Landslide (192) | Rockfall (96) | Avalanche (16) | Other (53) | Total |
|----------------|-------------|------------------|-----------------|---------------|----------------|------------|-------|
| Road (747)     | 53%         | 9%               | 20%             | 10%           | 1%             | 7%         | 100%  |
| Railway (99)   | 27%         | 2%               | 42%             | 20%           | 4%             | 5%         | 100%  |

35  
36

37 *Table 10: Distribution of road classes according event processes.*

| Road classes              | Flood<br>(420) | Debris<br>flow<br>(69) | Landsl<br>ide<br>(192) | Rockf<br>all<br>(96) | Avala<br>nche<br>(16) | Other<br>(53) | Avera<br>ge |
|---------------------------|----------------|------------------------|------------------------|----------------------|-----------------------|---------------|-------------|
| Highway (34)              | 7%             | 0%                     | 2%                     | 1%                   | 10%                   | 2%            | 5%          |
| Motorway (2)              | 0%             | 0%                     | 1%                     | 0%                   | 0%                    | 0%            | 0%          |
| Major transit road (99)   | 11%            | 8%                     | 11%                    | 36%                  | 36%                   | 6%            | 13%         |
| Regional road (94)        | 11%            | 7%                     | 18%                    | 18%                  | 9%                    | 8%            | 12%         |
| Urban road (426)          | 65%            | 37%                    | 48%                    | 38%                  | 36%                   | 82%           | 57%         |
| Minor road (72)           | 4%             | 42%                    | 15%                    | 4%                   | 9%                    | 2%            | 10%         |
| Forest or land trail (20) | 2%             | 6%                     | 5%                     | 5%                   | 0%                    | 0%            | 3%          |
| Total (747)               | 100%           | 100%                   | 100%                   | 100%                 | 100%                  | 100%          | 100%        |

38  
39 *Table 11: Distribution of railway classes according event processes.*

| Track class   | Flood<br>(420) | Debris flow<br>(69) | Landslide<br>(192) | Rockfall<br>(96) | Avalanche<br>(16) | Other<br>(53) | Average |
|---------------|----------------|---------------------|--------------------|------------------|-------------------|---------------|---------|
| National (29) | 37%            | 0%                  | 32%                | 30%              | 0%                | 0%            | 29%     |
| Regional (66) | 56%            | 100%                | 68%                | 70%              | 100%              | 60%           | 67%     |
| Tram (4)      | 7%             | 0%                  | 0%                 | 0%               | 0%                | 40%           | 4%      |
| Total (99)    | 100%           | 100%                | 100%               | 100%             | 100%              | 100%          | 100%    |

40  
41 *Table 12: Distribution of track sinuosity according event processes.*

| Sinuosity             | Flood<br>(420) | Debris flow<br>(69) | Landslide<br>(192) | Rockfall<br>(96) | Avalanche<br>(16) | Other<br>(53) | Total |
|-----------------------|----------------|---------------------|--------------------|------------------|-------------------|---------------|-------|
| Straight Line (175)   | 29%            | 6%                  | 11%                | 9%               | 0%                | 35%           | 21%   |
| Near Wide Curve (30)  | 2%             | 14%                 | 2%                 | 4%               | 0%                | 4%            | 4%    |
| Wide Curve (265)      | 14%            | 55%                 | 49%                | 44%              | 80%               | 35%           | 31%   |
| Near Tight Curve (39) | 2%             | 3%                  | 8%                 | 14%              | 0%                | 4%            | 4%    |
| Tight Curve (40)      | 4%             | 9%                  | 3%                 | 6%               | 0%                | 13%           | 5%    |
| Unknown* (297)        | 49%            | 13%                 | 27%                | 23%              | 20%               | 9%            | 35%   |
| Total (846)           | 100%           | 100%                | 100%               | 100%             | 100%              | 100%          | 100%  |

42 \*Localisation at communal level.

43 *Table 13: Distribution of track intersection according event processes.*

| Sinuosity               | Flood<br>(420) | Debris flow<br>(69) | Landslide<br>(192) | Rockfall<br>(96) | Avalanche<br>(16) | Other<br>(53) | Total |
|-------------------------|----------------|---------------------|--------------------|------------------|-------------------|---------------|-------|
| No intersection (319)   | 15%            | 61%                 | 55%                | 71%              | 73%               | 56%           | 38%   |
| Near intersection (158) | 23%            | 12%                 | 16%                | 6%               | 7%                | 31%           | 19%   |
| In intersection (72)    | 13%            | 14%                 | 2%                 | 0%               | 0%                | 4%            | 8%    |
| Unknown* (297)          | 49%            | 13%                 | 27%                | 23%              | 20%               | 9%            | 35%   |
| Total (846)             | 100%           | 100%                | 100%               | 100%             | 100%              | 100%          | 100%  |

44 \*Localisation at communal level.

45 *Table 14: Distribution of possibility of deviations according event processes.*

| Possibility of deviation | Flood<br>(420) | Debris flow<br>(69) | Landslide<br>(192) | Rockfall<br>(96) | Avalanche<br>(16) | Other<br>(53) | Total |
|--------------------------|----------------|---------------------|--------------------|------------------|-------------------|---------------|-------|
| Large (342)              | 63%            | 17%                 | 15%                | 8%               | 0%                | 52%           | 40%   |
| Middle (190)             | 21%            | 7%                  | 32%                | 17%              | 7%                | 33%           | 23%   |
| Small (102)              | 7%             | 6%                  | 13%                | 32%              | 66%               | 4%            | 12%   |
| Any (212)                | 9%             | 70%                 | 40%                | 43%              | 27%               | 11%           | 25%   |
| Total (846)              | 100%           | 100%                | 100%               | 100%             | 100%              | 100%          | 100%  |

46  
47 *Table 15: Distribution of track damage according event processes.*

| Damage level           | Flood<br>(420) | Debris flow<br>(69) | Landslide<br>(192) | Rockfall<br>(96) | Avalanche<br>(16) | Other<br>(53) | Total |
|------------------------|----------------|---------------------|--------------------|------------------|-------------------|---------------|-------|
| No closure (149)       | 34%            | 0%                  | 1%                 | 3%               | 6%                | 4%            | 18%   |
| Closure (483)          | 60%            | 35%                 | 50%                | 50%              | 81%               | 96%           | 57%   |
| Partial damage (143)   | 1%             | 39%                 | 37%                | 39%              | 13%               | 0%            | 17%   |
| Total destruction (53) | 1%             | 26%                 | 12%                | 8%               | 0%                | 0%            | 6%    |
| Unknown damage (18)    | 4%             | 0%                  | 0%                 | 0%               | 0%                | 0%            | 2%    |
| Total (846)            | 100%           | 100%                | 100%               | 100%             | 100%              | 100%          | 100%  |

48  
49

50 *Table 16: Distribution of damage and impact on vehicle according event processes.*

| Damage and impact type on vehicle                    | Flood<br>(420) | Debris flow<br>(69) | Landslide<br>(192) | Rockfall<br>(96) | Avalanche<br>(16) | Other<br>(53) | Total |
|------------------------------------------------------|----------------|---------------------|--------------------|------------------|-------------------|---------------|-------|
| No damage (803)                                      | 98%            | 93%                 | 96%                | 89%              | 80%               | 89%           | 95%   |
| Vehicle damage: direct impact <sup>1</sup> (25)      | 1%             | 7%                  | 1%                 | 7%               | 7%                | 7%            | 3%    |
| Vehicle damage: indirect impact <sup>2</sup><br>(18) | 1%             | 0%                  | 3%                 | 4%               | 13%               | 4%            | 2%    |
| Total (846)                                          | 100%           | 100%                | 100%               | 100%             | 100%              | 100%          | 100%  |

51 <sup>1</sup> Direct impact: a vehicle is directly reach by a hazard.

52 <sup>2</sup> Indirect impact: a vehicle collides an event mass already fallen on the track.

53 *Table 17: Distribution of injury and death importance according event processes.*

| Injury and death          | Flood<br>(420) | Debris flow<br>(69) | Landslide<br>(192) | Rockfall<br>(96) | Avalanche<br>(16) | Other<br>(53) | Total |
|---------------------------|----------------|---------------------|--------------------|------------------|-------------------|---------------|-------|
| No damage on people (828) | 99%            | 96%                 | 98%                | 93%              | 100%              | 98%           | 98%   |
| Injury (15)               | 1%             | 4%                  | 1%                 | 5%               | 0%                | 2%            | 2%    |
| Death (3)                 | 0%             | 0%                  | 1%                 | 2%               | 0%                | 0%            | 0%    |
| Total (846)               | 100%           | 100%                | 100%               | 100%             | 100%              | 100%          | 100%  |

55 *Table 18: Distribution of deviation length on roads according event processes.*

| Deviation length | Flood<br>(231) | Debris flow<br>(21) | Landslide<br>(115) | Rockfall<br>(56) | Avalanche<br>(11) | Other<br>(46) | Mean |
|------------------|----------------|---------------------|--------------------|------------------|-------------------|---------------|------|
| 1 km (146)       | 51%            | 28%                 | 11%                | 9%               | 0%                | 11%           | 31%  |
| 2-5 km (84)      | 17%            | 38%                 | 16%                | 4%               | 0%                | 39%           | 18%  |
| 6-9 km (45)      | 10%            | 10%                 | 9%                 | 7%               | 0%                | 15%           | 10%  |
| 10-20 km (116)   | 16%            | 5%                  | 44%                | 31%              | 12%               | 31%           | 25%  |
| 25-50 km (41)    | 4%             | 5%                  | 9%                 | 18%              | 50%               | 2%            | 7%   |
| 60-90 km (15)    | 1%             | 0%                  | 4%                 | 11%              | 0%                | 0%            | 3%   |
| 100-200 km (27)  | 1%             | 14%                 | 7%                 | 15%              | 25%               | 2%            | 5%   |
| 250-350 km (6)   | 0%             | 0%                  | 0%                 | 5%               | 13%               | 0%            | 1%   |
| Total (480)      | 100%           | 100%                | 100%               | 100%             | 100%              | 100%          | 100% |

57 *Table 19: Cost values estimation by square meter for the cost evaluation according event importance, damage level and transport mode.*

| Damage level [EUR] | Cost by m <sup>2</sup> ,<br>small event,<br>road | Cost by m <sup>2</sup> ,<br>middle event,<br>road | Cost by m <sup>2</sup> ,<br>large event,<br>road | Cost by m <sup>2</sup> ,<br>small event,<br>train | Cost by m <sup>2</sup> ,<br>middle event,<br>train | Cost by m <sup>2</sup> ,<br>large event,<br>train |
|--------------------|--------------------------------------------------|---------------------------------------------------|--------------------------------------------------|---------------------------------------------------|----------------------------------------------------|---------------------------------------------------|
| No closure         | 5                                                | 5                                                 | 5                                                | 5                                                 | 5                                                  | 5                                                 |
| Closure            | 85                                               | 130                                               | 170                                              | 300                                               | 340                                                | 385                                               |
| Partial damage     | 255                                              | 300                                               | 340                                              | 470                                               | 510                                                | 555                                               |
| Total destruction  | 850                                              | 890                                               | 980                                              | 1065                                              | 1105                                               | 1145                                              |
| Unknown damage     | 130                                              | 170                                               | 215                                              | 255                                               | 300                                                | 340                                               |

60 *Table 20: Direct damage costs distribution according events types*

| Damage level [EUR]      | Flood<br>(420) | Debris<br>flow (69) | Landslide<br>(192) | Rockfall<br>(96) | Avalanche<br>(16) | Other<br>(53) | Total   |
|-------------------------|----------------|---------------------|--------------------|------------------|-------------------|---------------|---------|
| Annual cost [EUR]       |                |                     |                    |                  |                   |               |         |
| No closure (149)        | 12665          | 340                 | 85                 | 765              | 255               | 170           | 14280   |
| Closure (483)           | 514250         | 71400               | 262650             | 160650           | 28900             | 107950        | 1145800 |
| Partial damage (143)    | 25500          | 127500              | 425000             | 227800           | 40800             | 0             | 846600  |
| Total destruction (53)  | 72250          | 459850              | 528700             | 246500           | 0                 | 0             | 1307300 |
| Unknown damage (18)     | 45900          | 0                   | 0                  | 0                | 0                 | 0             | 45900   |
| Annual cost [million €] | 0.67           | 0.66                | 1.22               | 0.64             | 0.07              | 0.11          | 3.36    |
| Avg. cost by event      | 8000           | 47800               | 31700              | 33100            | 21900             | 10200         | 19900   |

62 *Table 21: Annually distribution of events according event processes.*

| Year        | Flood<br>(420) | Debris flow<br>(69) | Landslide<br>(192) | Rockfall<br>(96) | Avalanche<br>(16) | Other<br>(53) | Average |
|-------------|----------------|---------------------|--------------------|------------------|-------------------|---------------|---------|
| 2012 (60)   | 5%             | 3%                  | 7%                 | 17%              | 25%               | 2%            | 7%      |
| 2013 (99)   | 11%            | 10%                 | 16%                | 14%              | 6%                | 2%            | 12%     |
| 2014 (173)  | 20%            | 10%                 | 30%                | 20%              | 25%               | 0%            | 20%     |
| 2015 (245)  | 25%            | 49%                 | 22%                | 17%              | 25%               | 77%           | 29%     |
| 2016 (269)  | 38%            | 28%                 | 24%                | 33%              | 19%               | 19%           | 32%     |
| Total (846) | 100%           | 100%                | 100%               | 100%             | 100%              | 100%          | 100%    |

64

65 1.2 Key words

66 Table 22: Key words (in red) used in the Google Alerts to create the database.

| English        | French                | German          | Italian      |
|----------------|-----------------------|-----------------|--------------|
| avalanche      | avalanche             | Lawinne         | valanga      |
| bad weather    | intempéries           | Unwetter        |              |
| flood          |                       | Hochwasser      |              |
| hail           | grêle                 | Hagel           |              |
| heavy rainfall | forte pluies          | Heftige Regen   |              |
| ice avalanche  |                       | Eislawine       |              |
| inundation     |                       | Überflutung     |              |
| inundation     | inondation            | Überschwemmung  |              |
| landslide      | glissement de terrain | Erdrutsch       | frana        |
| landslide      |                       | Hangrutsch      |              |
| landslide      |                       | Hachrutsche     |              |
| landslide      |                       | Rüfenniedergang |              |
| landslip       | glissement            | Rutschung       |              |
| mountain       | pan de montagne       |                 |              |
| mud            | boue                  | Schlamm         |              |
| mudflow        | coulée de boue        | Schlammlawine   |              |
| mudslide       |                       | Erdlawine       |              |
| pirock         | caillou               | Stein           | massi        |
| rockfall       |                       | Bergsturz       |              |
| rockfall       |                       | Felsabbruch     |              |
| rockfall       | éboulement            | Felsbrock       |              |
| rockfall       | écroulement           | Felsbrocken     |              |
| rockfall       |                       | Felssturz       |              |
| rockslide      | chute de blocs        | Steinschlag     | cadono sassi |
| scree          |                       | Geröll          |              |
| scree          | éboulis               | Schutt          |              |
| storm          | tempête               | Sturm           |              |
| thunderstorm   | orage                 | Gewitter        |              |
| under water    | sous l'eau            |                 |              |
| wind           | vent                  | Wind            |              |

67

68 1.3 Database attribute

69 Figure 1: Attributes of the database.

Number of attributes: 172

Attributes of the UNIL database of natural hazard events affecting the Swiss transportation network (2012-2016)

| Category | Attribute   | Date                     |                                              |                   |                    |                  |                                        |                                               |                     |                                  |                                                         | D_IDEventsSameDay                                   | D_IDDay                                                            | D_DayPart                                 | D_HourPrecision                                 | D_Hour                                           | D_Season                                                 | D_DayName | D_MonthWeek | D_Day | D_Month | D_Year | D_IDdate | Unit | MuenichRe |           |         |                   |
|----------|-------------|--------------------------|----------------------------------------------|-------------------|--------------------|------------------|----------------------------------------|-----------------------------------------------|---------------------|----------------------------------|---------------------------------------------------------|-----------------------------------------------------|--------------------------------------------------------------------|-------------------------------------------|-------------------------------------------------|--------------------------------------------------|----------------------------------------------------------|-----------|-------------|-------|---------|--------|----------|------|-----------|-----------|---------|-------------------|
|          |             | EventID                  | D_IDdate                                     | D_Year            | D_Month            | D_Day            | D_MonthWeek                            | D_DayName                                     | D_Season            | D_Hour                           | D_HourPrecision                                         |                                                     |                                                                    |                                           |                                                 |                                                  |                                                          |           |             |       |         |        |          |      |           | D_DayPart | D_IDDay | D_IDEventsSameDay |
|          | Description | Unique ID for each event | Unique ID for each event containing the date | Year of the event | Month of the event | Day of the event | Month divided into 4 quarters          | Name of the day of the event                  | Season of the event | Hour of the event hourly rounded | Hour of the event                                       | Day part of the event                               | Unique ID for each event day (same ID when >1 event per day)       | Unique ID for event occurred the same day | Long time period in which the event is included | Short time period in which the event is included | period given by MuenichRe in which the event is included |           |             |       |         |        |          |      |           |           |         |                   |
| Exemple  |             | 431                      | 2015050400                                   | 2015              | 5                  | 4                | 5-1                                    | Monday                                        | Spring              | 10:00:00                         | 10:15:00                                                | Morning                                             | 20150504                                                           | 2                                         | y.m.d-y.m.d-2015.04.27-2015.07.25               | y.m.d-y.m.d-2015.04.27-2015.05.07                | y.m.d-y.m.d-2014.06.03-2014.06.12                        |           |             |       |         |        |          |      |           |           |         |                   |
| Comment  |             | -                        | -                                            | From 2011 to 2015 | -                  | -                | First quarter (1) of the 5th month (5) | Useful to categorise business day and weekend | -                   | -                                | 5 parts: morning, afternoon, evening, night and unknown | Allow to recognise the day when with several events | The maximal ID by event day gives the nb of events during this day |                                           |                                                 |                                                  | From MuenichRe yearly natural catastrophes analysis      |           |             |       |         |        |          |      |           |           |         |                   |
| Source   |             | -                        | -                                            | Online article    | Online article     | Online article   | Online article                         | Online article                                | Online article      | Online article                   | Online article                                          | Online article                                      | -                                                                  | -                                         | -                                               | -                                                | MuenichRe                                                |           |             |       |         |        |          |      |           |           |         |                   |
|          |             | 1                        | 2                                            | 3                 | 4                  | 5                | 6                                      | 7                                             | 8                   | 9                                | 10                                                      | 11                                                  | 12                                                                 | 13                                        | 14                                              | 15                                               | 16                                                       |           |             |       |         |        |          |      |           |           |         |                   |

| Location    |                               | Number of attributes: 21       |                             |                                                                  |                                                     |                                                                                         |                                                                                   |                                                            |                                        |                                                   |  |
|-------------|-------------------------------|--------------------------------|-----------------------------|------------------------------------------------------------------|-----------------------------------------------------|-----------------------------------------------------------------------------------------|-----------------------------------------------------------------------------------|------------------------------------------------------------|----------------------------------------|---------------------------------------------------|--|
| Category    | L_Canton                      | L_Commune                      | L_Detail                    | L_Precision                                                      | L_SitGeo                                            | L_Orislope                                                                              | L_Urbanity                                                                        | L_Slope                                                    | L_SlopeRounded                         | L_Landscape                                       |  |
| Attribute   |                               |                                |                             |                                                                  |                                                     |                                                                                         |                                                                                   |                                                            |                                        |                                                   |  |
| Description | Canton where the event occurs | Commune where the event occurs | Detail to help the location | Precision of the location                                        | Geographical situation of the event                 | If slope: orientation of the slope                                                      | Urbanity of the event                                                             | Slope angle average in an 25 meter radius around the event | Slope angle rounded to the nearest ten | Landscape of the event localotn                   |  |
| Unit        | -                             | -                              | -                           | -                                                                | -                                                   | -                                                                                       | -                                                                                 | [°]                                                        | [°]                                    |                                                   |  |
| Exemple     | Valais                        | Bagnes                         | -                           | Accurate                                                         | Slope                                               | North-East                                                                              | Forest                                                                            | 13                                                         | 13                                     | Dry mountainous landscape of western central Alps |  |
| Comment     | -                             | -                              | -                           | Three levels of accuracy: accurate, middle and communal accuracy | Four classes: plain, ridge, slope and valley bottom | Nine classes: north, north-east, south-east, south-west, west, north-west and any slope | Seven classes: mountain, forest, country, hamlet, village, agglomeration and town | From 0 ° to 56°                                            | From 0 ° to 60°                        | 36 types                                          |  |
| Source      | Online article                | Online article                 | Online article              | Online article and map                                           | Map                                                 | Map                                                                                     | Map                                                                               | GIS                                                        | GIS                                    | GIS                                               |  |
|             | 17                            | 18                             | 19                          | 20                                                               | 21                                                  | 22                                                                                      | 23                                                                                | 24                                                         | 25                                     | 26                                                |  |

| LOCATION                                                                         |                                 |                                               |                                               |                                               |                                                |                                                |                                                |                                         |                                          |                                         |
|----------------------------------------------------------------------------------|---------------------------------|-----------------------------------------------|-----------------------------------------------|-----------------------------------------------|------------------------------------------------|------------------------------------------------|------------------------------------------------|-----------------------------------------|------------------------------------------|-----------------------------------------|
| L_Areas                                                                          | L_Area_reg                      | L_MN03_X                                      | L_MN03_Y                                      | L_MN03_Z                                      | L_MN95_X                                       | L_MN95_Y                                       | L_MN95_Z                                       | L_WGS84_La                              | L_WGS84_Z                                |                                         |
| Areas of the event location                                                      | Regional area of the location   | X coordinates in CH1903 coordinate system [m] | Y coordinates in CH1903 coordinate system [m] | Z coordinates in CH1903 coordinate system [m] | X coordinates in CH1903+ coordinate system [m] | Y coordinates in CH1903+ coordinate system [m] | Z coordinates in CH1903+ coordinate system [m] | Latitude in WGS84 coordinate system [°] | Longitude in WGS84 coordinate system [°] | Altitude in WGS84 coordinate system [m] |
| Alpine region                                                                    | Alps                            | 568456                                        | 98247                                         | 1377                                          | 2588455                                        | 1098247                                        | 1377                                           | 46.03566307                             | 7.289538659                              | 1431                                    |
| 5 types: Alpine region, Swiss Plateau, Tabular Jura, Folded Jura and Independent | 3 types: Jura, Plateau and Alps | -                                             | -                                             | -                                             | -                                              | -                                              | -                                              | -                                       | -                                        | -                                       |
| GIS                                                                              | Map                             | GIS                                           | GIS                                           | GIS                                           | GIS                                            | GIS                                            | GIS                                            | GIS                                     | GIS                                      | GIS                                     |

| Category    | Event characterization                                             |                                                                                            |                                                     |                                                                           |                                                                                                |                                                           |                                        |                                      |                                            |                   |                           |                               |
|-------------|--------------------------------------------------------------------|--------------------------------------------------------------------------------------------|-----------------------------------------------------|---------------------------------------------------------------------------|------------------------------------------------------------------------------------------------|-----------------------------------------------------------|----------------------------------------|--------------------------------------|--------------------------------------------|-------------------|---------------------------|-------------------------------|
|             | Number of attributes: 12                                           |                                                                                            |                                                     |                                                                           |                                                                                                |                                                           |                                        |                                      |                                            |                   |                           |                               |
| Attribute   | E_Type                                                             | E_TypePrec                                                                                 | E_UpDownst                                          | E_UpDownst Risk                                                           | E_Provenan                                                                                     | E_Volume                                                  | E_Masse                                | E_Width                              | E_Importan                                 | E_Other           | E_PictureName             | E_Picture                     |
| Description | Type of natural hazard event                                       | Precise type of natural hazard event                                                       | Origin up or downstream of the natural hazard event | Origin up, downstream or only risk of the event                           | Estimation of the distance of the event origin                                                 | Volume of the event                                       | Masse of the event                     | Width of the event mass on the track | Importance of the event                    | Other information | Picture name of the event | Picture                       |
| Unit        | -                                                                  | -                                                                                          | -                                                   | -                                                                         | [m] or -                                                                                       | [m <sup>3</sup> ]                                         | [kg]                                   | [m]                                  | -                                          | -                 | -                         | -                             |
| Exemple     | Landslide                                                          | Landslide                                                                                  | -                                                   | -                                                                         | -                                                                                              | -                                                         | -                                      | -                                    | Small                                      | -                 | 2013050400.jpg            | -                             |
| Comment     | 6 types: rockfall, debris flow, landslide, avalanche, flood, other | 8 types: rockfall, debris flow, landslide, avalanche, flood, hail, snowdrift, falling tree | 3 classes: upstream, downstream and unknown         | 4 classes: upstream, risk (no event, only preventive closure) and unknown | 3 classes: near (few meters to 10 meters, far (> 10 m) or prevention (only preventive closure) | Estimation of the failed volume on the track of the event | Masse of the event (only for rockfall) | -                                    | 3 classes: small, middle, big (huge event) | -                 | -                         | -                             |
| Source      | Online article                                                     | Online article                                                                             | Online article                                      | Online article                                                            | Online article                                                                                 | Online article                                            | Online article                         | Online article                       | Online article                             | Online article    | Online article            | Online article or field visit |
|             | 38                                                                 | 39                                                                                         | 40                                                  | 41                                                                        | 42                                                                                             | 43                                                        | 44                                     | 45                                   | 46                                         | 47                | 48                        | 49                            |







|                                                 |                                                                                                                             |                                                                                                                             |                                                                                                                             |                                                                                                                             |                                                                                                                             |                                                                                                                             |                                                                                                                             |                                                                                                                             |                                                                                                                             |                                                                                                                             |                                                                                                                             |                                                                                                                             |                                  |
|-------------------------------------------------|-----------------------------------------------------------------------------------------------------------------------------|-----------------------------------------------------------------------------------------------------------------------------|-----------------------------------------------------------------------------------------------------------------------------|-----------------------------------------------------------------------------------------------------------------------------|-----------------------------------------------------------------------------------------------------------------------------|-----------------------------------------------------------------------------------------------------------------------------|-----------------------------------------------------------------------------------------------------------------------------|-----------------------------------------------------------------------------------------------------------------------------|-----------------------------------------------------------------------------------------------------------------------------|-----------------------------------------------------------------------------------------------------------------------------|-----------------------------------------------------------------------------------------------------------------------------|-----------------------------------------------------------------------------------------------------------------------------|----------------------------------|
| M_Temp_av_g_10d                                 | M_Temp_min_Corr                                                                                                             | M_Temp_min_5d_Corr                                                                                                          | M_Temp_min_10d_Corr                                                                                                         | M_Temp_max_Corr                                                                                                             | M_Temp_max_5d_Corr                                                                                                          | M_Temp_max_10d_Corr                                                                                                         | M_Temp_avg_Corr                                                                                                             | M_Temp_avg_5d_Corr                                                                                                          | M_Temp_avg_10d_Corr                                                                                                         | M_Temp_amp_Corr                                                                                                             | M_Temp_amp_5d_Corr                                                                                                          | M_Temp_amp_10d_Corr                                                                                                         | M_Wind_avg                       |
| Average temperature the last 10 days from event | Corrected minimum temperature the event day                                                                                 | Corrected minimum temperature the last 5 days from event                                                                    | Corrected minimum temperature the last 10 days from event                                                                   | Corrected maximum temperature the event day                                                                                 | Corrected maximum temperature the last 5 days from event                                                                    | Corrected maximum temperature the last 10 days from event                                                                   | Corrected average temperature the event day                                                                                 | Corrected average temperature the last 5 days from event                                                                    | Corrected average temperature the last 10 days from event                                                                   | Temperature amplitude the event day                                                                                         | Temperature amplitude the last 10 days from the event                                                                       | Temperature amplitude the last 5 days from the event                                                                        | Average wind speed the event day |
| [°C]                                            | [°C]                                                                                                                        | [°C]                                                                                                                        | [°C]                                                                                                                        | [°C]                                                                                                                        | [°C]                                                                                                                        | [°C]                                                                                                                        | [°C]                                                                                                                        | [°C]                                                                                                                        | [°C]                                                                                                                        | [°C]                                                                                                                        | [°C]                                                                                                                        | [°C]                                                                                                                        | [km/h]                           |
| 7                                               | 9                                                                                                                           | 3                                                                                                                           | 16                                                                                                                          | 16                                                                                                                          | 17                                                                                                                          | 17                                                                                                                          | 12                                                                                                                          | 9                                                                                                                           | 9                                                                                                                           | 9                                                                                                                           | 12                                                                                                                          | 15                                                                                                                          | 8                                |
|                                                 | Correction with height difference between weather station and event location with lapse rate of -0.65 °C for +100m altitude | Correction with height difference between weather station and event location with lapse rate of -0.65 °C for +100m altitude | Correction with height difference between weather station and event location with lapse rate of -0.65 °C for +100m altitude | Correction with height difference between weather station and event location with lapse rate of -0.65 °C for +100m altitude | Correction with height difference between weather station and event location with lapse rate of -0.65 °C for +100m altitude | Correction with height difference between weather station and event location with lapse rate of -0.65 °C for +100m altitude | Correction with height difference between weather station and event location with lapse rate of -0.65 °C for +100m altitude | Correction with height difference between weather station and event location with lapse rate of -0.65 °C for +100m altitude | Correction with height difference between weather station and event location with lapse rate of -0.65 °C for +100m altitude | Correction with height difference between weather station and event location with lapse rate of -0.65 °C for +100m altitude | Correction with height difference between weather station and event location with lapse rate of -0.65 °C for +100m altitude | Correction with height difference between weather station and event location with lapse rate of -0.65 °C for +100m altitude |                                  |
| MeteoSwiss                                      | MeteoSwiss                                                                                                                  | MeteoSwiss                                                                                                                  | MeteoSwiss                                                                                                                  | MeteoSwiss                                                                                                                  | MeteoSwiss                                                                                                                  | MeteoSwiss                                                                                                                  | MeteoSwiss                                                                                                                  | MeteoSwiss                                                                                                                  | MeteoSwiss                                                                                                                  | MeteoSwiss                                                                                                                  | MeteoSwiss                                                                                                                  | MeteoSwiss                                                                                                                  | MeteoSwiss                       |
| 116                                             | 117                                                                                                                         | 118                                                                                                                         | 119                                                                                                                         | 120                                                                                                                         | 121                                                                                                                         | 122                                                                                                                         | 123                                                                                                                         | 124                                                                                                                         | 125                                                                                                                         | 126                                                                                                                         | 127                                                                                                                         | 128                                                                                                                         | 129                              |

|                                               |                                                |                                               |                                                |                                                   |                                                    |                                 |                                       |                                                    |                                                     |                                     |                                      |                                                              |                                                             |     |     |
|-----------------------------------------------|------------------------------------------------|-----------------------------------------------|------------------------------------------------|---------------------------------------------------|----------------------------------------------------|---------------------------------|---------------------------------------|----------------------------------------------------|-----------------------------------------------------|-------------------------------------|--------------------------------------|--------------------------------------------------------------|-------------------------------------------------------------|-----|-----|
| M_Wind_avg_5d                                 | M_Wind_avg_10d                                 | M_Wind_max_5d                                 | M_Wind_max_10d                                 | M_Wind_dir_5d                                     | M_Wind_dir_10d                                     | M_Snow                          | M_Fresh_snow                          | M_Fresh_snow_5d                                    | M_Fresh_snow_10d                                    | M_Acronym_Weather                   | M_Alt_Weather                        | M_Diff_Alt_Weather                                           | M_Dist_Weather                                              |     |     |
| Average wind speed the 5 last days from event | Average wind speed the last 10 days from event | Maximum wind speed the last 5 days from event | Maximum wind speed the last 10 days from event | Average wind direction the last 5 days from event | Average wind direction the last 10 days from event | Snow cover height the event day | Fresh snow cover height the event day | Fresh snow cover height the last 5 days from event | Fresh snow cover height the last 10 days from event | Acronym of the used weather station | Altitude of the used weather station | Altitude difference between the weather station and location | Distance between the weather station and the event location |     |     |
| [km/h]                                        | [km/h]                                         | [km/h]                                        | [km/h]                                         | [°]                                               | [°]                                                | [cm]                            | [cm]                                  | [cm]                                               | [cm]                                                |                                     | [m] a.s.l.                           | [m]                                                          | [km]                                                        |     |     |
| 9                                             | 10                                             | 32                                            | 46                                             | 48                                                | 63.9                                               | 0                               | 0                                     | 0                                                  | 0                                                   | ZER                                 | 1638                                 | 261                                                          | 36                                                          |     |     |
|                                               |                                                |                                               |                                                | 0° = North, 90° = East, 180° = South, 270° = West | 0° = North, 90° = East, 180° = South, 270° = West  |                                 |                                       |                                                    |                                                     |                                     |                                      |                                                              |                                                             |     |     |
| MeteoSwiss                                    | MeteoSwiss                                     | MeteoSwiss                                    | MeteoSwiss                                     | MeteoSwiss                                        | MeteoSwiss                                         | MeteoSwiss                      | MeteoSwiss                            | MeteoSwiss                                         | MeteoSwiss                                          | MeteoSwiss                          | MeteoSwiss                           | MeteoSwiss                                                   | MeteoSwiss                                                  |     |     |
| 130                                           | 131                                            | 132                                           | 133                                            | 134                                               | 135                                                | 136                             | 137                                   | 138                                                | 139                                                 | 140                                 | 141                                  | 142                                                          | 143                                                         | 144 | 145 |

## Geology Number of attributes: 11

| Category Attribute | Geology                |           |           |                                                                                 |                                               |                    |            |                                      |                                                                                             |                                 |                 |
|--------------------|------------------------|-----------|-----------|---------------------------------------------------------------------------------|-----------------------------------------------|--------------------|------------|--------------------------------------|---------------------------------------------------------------------------------------------|---------------------------------|-----------------|
|                    | G_watershed            | G_Geol    | G_Tecto_f | G_Geol_f                                                                        | G_Tec1_f                                      | G_Tec2_f           | G_Tec3_f   | G_Acquifer                           | G_Hydrogeology                                                                              | G_Productivity                  | G_Geology       |
| Description        | Watershed on the event |           |           | Geology                                                                         | Tectonic 1                                    | Tectonic 2         | Tectonic 3 | Aquifer                              | Hydrogeology                                                                                | Productivity of the event field | General geology |
| Unit               | -                      | -         | -         | Gneiss et micaschistes (y compris migmatites et phyllites; princ. metasediment) | -                                             | -                  | -          | Aquifer reservoirs in coherent rocks | Sparsely productive aquifer reservoirs in non-karstified, cracked and porous coherent rocks | -                               | -               |
| Exemple            | RHONE                  | er pi     |           |                                                                                 | Nappes de socle cristallin penniques moyennes | Nappe du Mont-Fort |            |                                      |                                                                                             | Variable productivity           | Sericite gneiss |
| Comment            | -                      | -         | -         | -                                                                               | -                                             | -                  | -          | -                                    | -                                                                                           | -                               | -               |
| Source             | Swisstopo              | Swisstopo | Swisstopo | Swisstopo                                                                       | Swisstopo                                     | Swisstopo          | Swisstopo  | Swisstopo                            | Swisstopo                                                                                   | Swisstopo                       | Swisstopo       |
|                    | 146                    | 147       | 148       | 149                                                                             | 150                                           | 151                | 152        | 153                                  | 154                                                                                         | 155                             | 156             |

## Source Number of attributes: 16

| Category Attribute | Source                                                                                                                                                                                                                                              |                                                                                                                                                                                                                                                                 |                                                                                                                                                                                                                                                         |                                                                                                                                                                                                 |                                                                                                                                                                                                                                                                                 |                                                                                                                                                                                                                                 |                                                                                                                                                                                                                                   |                                                                                                                                                                                                 |                                                                                                                                                                                                                               |                                                                                                                                                   |                                                                                                                                                                                                                                 |                                                                                                                       |                         |                         |                         |                         |   |
|--------------------|-----------------------------------------------------------------------------------------------------------------------------------------------------------------------------------------------------------------------------------------------------|-----------------------------------------------------------------------------------------------------------------------------------------------------------------------------------------------------------------------------------------------------------------|---------------------------------------------------------------------------------------------------------------------------------------------------------------------------------------------------------------------------------------------------------|-------------------------------------------------------------------------------------------------------------------------------------------------------------------------------------------------|---------------------------------------------------------------------------------------------------------------------------------------------------------------------------------------------------------------------------------------------------------------------------------|---------------------------------------------------------------------------------------------------------------------------------------------------------------------------------------------------------------------------------|-----------------------------------------------------------------------------------------------------------------------------------------------------------------------------------------------------------------------------------|-------------------------------------------------------------------------------------------------------------------------------------------------------------------------------------------------|-------------------------------------------------------------------------------------------------------------------------------------------------------------------------------------------------------------------------------|---------------------------------------------------------------------------------------------------------------------------------------------------|---------------------------------------------------------------------------------------------------------------------------------------------------------------------------------------------------------------------------------|-----------------------------------------------------------------------------------------------------------------------|-------------------------|-------------------------|-------------------------|-------------------------|---|
|                    | Source1                                                                                                                                                                                                                                             | Source2                                                                                                                                                                                                                                                         | Source3                                                                                                                                                                                                                                                 | Source4                                                                                                                                                                                         | Source5                                                                                                                                                                                                                                                                         | Source6                                                                                                                                                                                                                         | Source7                                                                                                                                                                                                                           | Source8                                                                                                                                                                                         | Source9                                                                                                                                                                                                                       | Source10                                                                                                                                          | Source11                                                                                                                                                                                                                        | Source12                                                                                                              | Source13                | Source14                | Source15                | Source16                |   |
| Description        | Source 1 for the event                                                                                                                                                                                                                              | Source 2 for the event                                                                                                                                                                                                                                          | Source 3 for the event                                                                                                                                                                                                                                  | Source 4 for the event                                                                                                                                                                          | Source 5 for the event                                                                                                                                                                                                                                                          | Source 6 for the event                                                                                                                                                                                                          | Source 7 for the event                                                                                                                                                                                                            | Source 8 for the event                                                                                                                                                                          | Source 9 for the event                                                                                                                                                                                                        | Source 10 for the event                                                                                                                           | Source 11 for the event                                                                                                                                                                                                         | Source 12 for the event                                                                                               | Source 13 for the event | Source 14 for the event | Source 15 for the event | Source 16 for the event |   |
| Unit               | -                                                                                                                                                                                                                                                   | -                                                                                                                                                                                                                                                               | -                                                                                                                                                                                                                                                       | -                                                                                                                                                                                               | -                                                                                                                                                                                                                                                                               | -                                                                                                                                                                                                                               | -                                                                                                                                                                                                                                 | -                                                                                                                                                                                               | -                                                                                                                                                                                                                             | -                                                                                                                                                 | -                                                                                                                                                                                                                               | -                                                                                                                     | -                       | -                       | -                       | -                       |   |
| Exemple            | <a href="https://www.rts.ch/info/suisse/749453-le-chablais-et-le-bas-valais-resistent-en-etat-d-alerte-face-aux-pluies.html">https://www.rts.ch/info/suisse/749453-le-chablais-et-le-bas-valais-resistent-en-etat-d-alerte-face-aux-pluies.html</a> | <a href="http://www.24h-regions/rivera-chablais/A-Monthey-les-secours-sont-presses-avant-les-riverains-de-la-Viaze/story/22490259">http://www.24h-regions/rivera-chablais/A-Monthey-les-secours-sont-presses-avant-les-riverains-de-la-Viaze/story/22490259</a> | <a href="http://www.24h-regions/valais/canton/monthey-les-secours-sont-presses-avant-les-riverains-de-la-Viaze/story/10543703">http://www.24h-regions/valais/canton/monthey-les-secours-sont-presses-avant-les-riverains-de-la-Viaze/story/10543703</a> | <a href="http://www.24h-regions/monthey-revillage-soulaageevacuation-300-personnes/story/19307318">http://www.24h-regions/monthey-revillage-soulaageevacuation-300-personnes/story/19307318</a> | <a href="http://www.lenovelliste.ch/artic/les-valais/canton/inondation-a-st-gingolph-temoignages-du-president-at-restaurants/story/378561">http://www.lenovelliste.ch/artic/les-valais/canton/inondation-a-st-gingolph-temoignages-du-president-at-restaurants/story/378561</a> | <a href="https://www.letemps.ch/Page/uid/006525de-10c0-11e4-8a43-4a205b10b56/les_eau_en_furiedans_toute_la_Suisse">https://www.letemps.ch/Page/uid/006525de-10c0-11e4-8a43-4a205b10b56/les_eau_en_furiedans_toute_la_Suisse</a> | <a href="http://www.arci.info.ch/articles/regions/neuchate-let-littoral/inondations-a-cornaux-et-alignieres-378552">http://www.arci.info.ch/articles/regions/neuchate-let-littoral/inondations-a-cornaux-et-alignieres-378552</a> | <a href="http://www.romandie.com/news/Le-Chablais-fortement-touche-par-les-inondations/589780.rom">http://www.romandie.com/news/Le-Chablais-fortement-touche-par-les-inondations/589780.rom</a> | <a href="http://www.rts.ch/info/suisse/49453-inondations-attouche-par-les-riverains-avant-les-forces-pluies.html">http://www.rts.ch/info/suisse/49453-inondations-attouche-par-les-riverains-avant-les-forces-pluies.html</a> | <a href="http://www.24h-regions/valais/fermees-cause-deluge/story/27182180">http://www.24h-regions/valais/fermees-cause-deluge/story/27182180</a> | <a href="https://www.rfi.ch/fr/Actualite/Romande/certaines-routes-valaisannes-fermees-cause-deluge/story/27182180">https://www.rfi.ch/fr/Actualite/Romande/certaines-routes-valaisannes-fermees-cause-deluge/story/27182180</a> | <a href="http://www.20min.ch/ro/news/romandie/story/25748211">http://www.20min.ch/ro/news/romandie/story/25748211</a> | -                       | -                       | -                       | -                       | - |
| Comment            | -                                                                                                                                                                                                                                                   | -                                                                                                                                                                                                                                                               | -                                                                                                                                                                                                                                                       | -                                                                                                                                                                                               | -                                                                                                                                                                                                                                                                               | -                                                                                                                                                                                                                               | -                                                                                                                                                                                                                                 | -                                                                                                                                                                                               | -                                                                                                                                                                                                                             | -                                                                                                                                                 | -                                                                                                                                                                                                                               | -                                                                                                                     | -                       | -                       | -                       | -                       |   |
| Source             | Google Alerts                                                                                                                                                                                                                                       | Google Alerts                                                                                                                                                                                                                                                   | Google Alerts                                                                                                                                                                                                                                           | Google Alerts                                                                                                                                                                                   | Google Alerts                                                                                                                                                                                                                                                                   | Google Alerts                                                                                                                                                                                                                   | Google Alerts                                                                                                                                                                                                                     | Google Alerts                                                                                                                                                                                   | Google Alerts                                                                                                                                                                                                                 | Google Alerts                                                                                                                                     | Google Alerts                                                                                                                                                                                                                   | Google Alerts                                                                                                         | Google Alerts           | Google Alerts           | Google Alerts           | Google Alerts           |   |
|                    | 157                                                                                                                                                                                                                                                 | 158                                                                                                                                                                                                                                                             | 159                                                                                                                                                                                                                                                     | 160                                                                                                                                                                                             | 161                                                                                                                                                                                                                                                                             | 162                                                                                                                                                                                                                             | 163                                                                                                                                                                                                                               | 164                                                                                                                                                                                             | 165                                                                                                                                                                                                                           | 166                                                                                                                                               | 167                                                                                                                                                                                                                             | 168                                                                                                                   | 169                     | 170                     | 171                     | 172                     |   |



83 1.4.2 Database on ArcGIS online

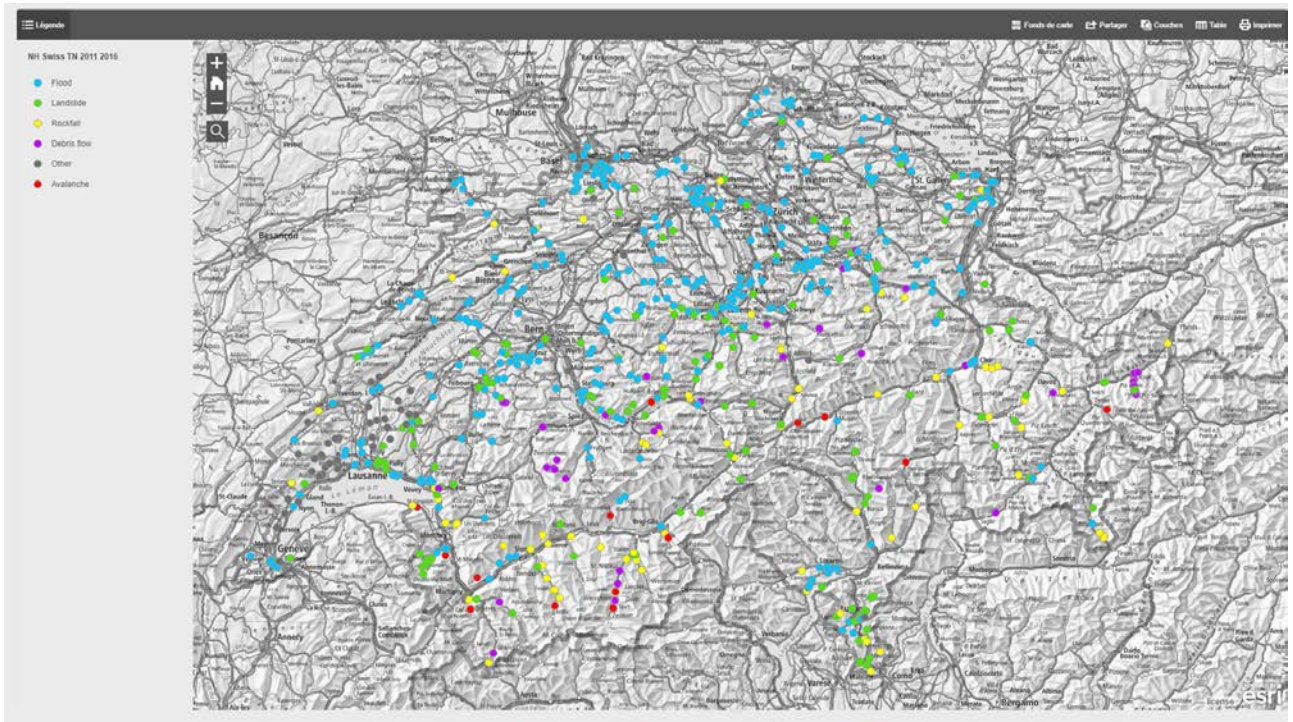

84

85 *Figure 3: Database on ArcGIS online.*

86 Available at (last access: 25 January 2018):

87 <http://unil.maps.arcgis.com/apps/MapTools/index.html?webmap=34ee3eb719a647889abd34175969d781>, last access: 25

88 January 2018

89
